# Supplementary material for: Bacterial Community Development in Experimental Gingivitis
Source: PubMed Central journal article supplement (PMC3743832; doi:10.1371/journal.pone.0071227), 2013-08-14
Supplement: pone.0071227.s002.pdf [file pone.0071227.s002.pdf]

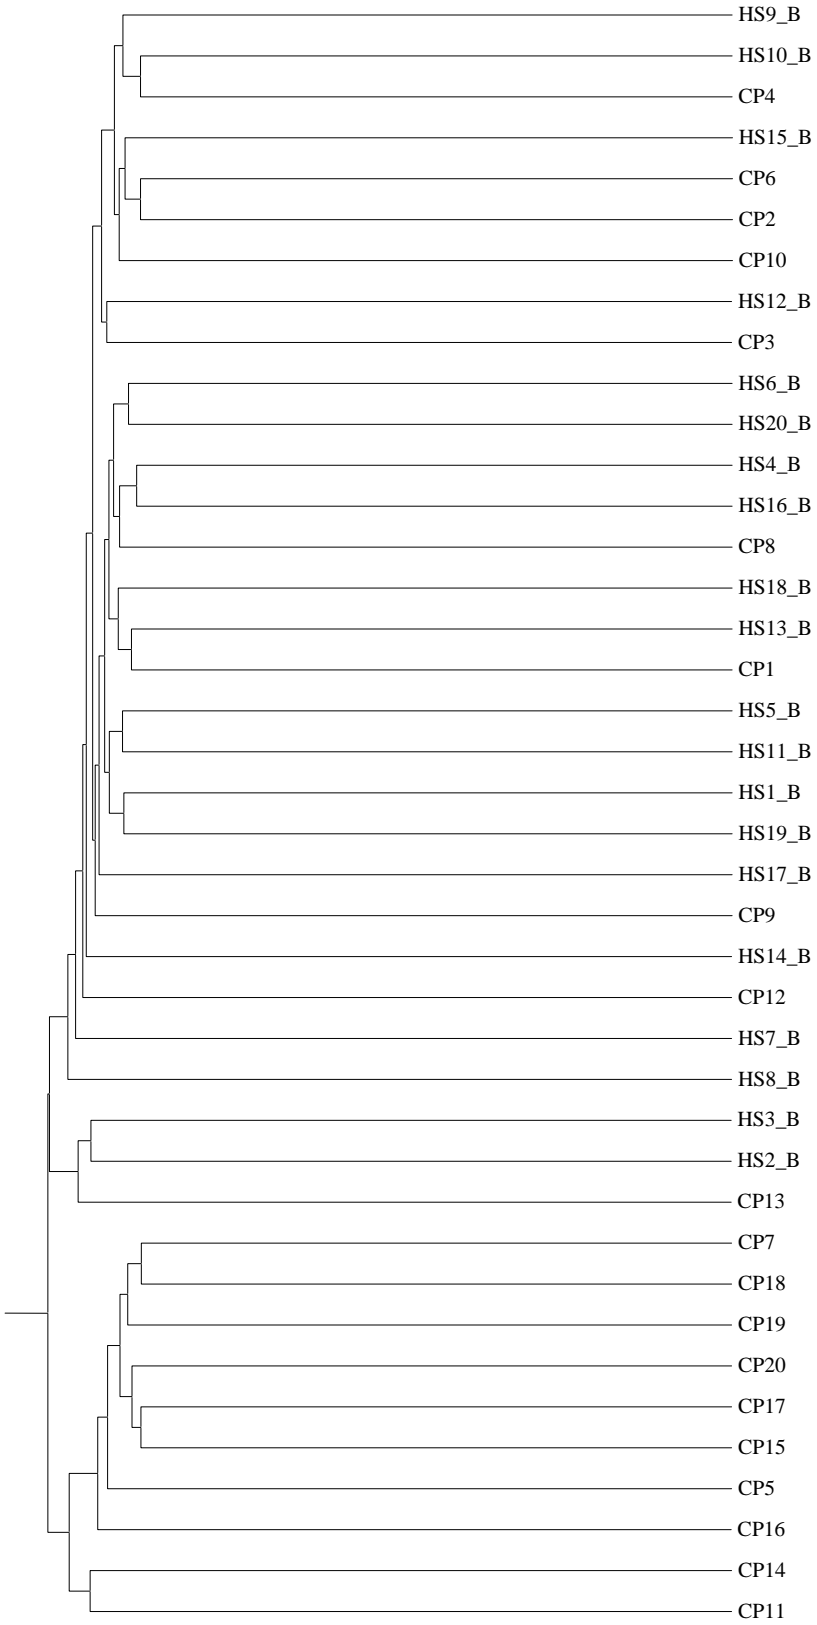

0.1
